# Supplementary material for: Wellbeing Literacy: Conceptualization, Measurement, and Preliminary Empirical Findings from Students, Parents and School Staff
Source: Int J Environ Res Public Health. 2021 Feb 4;18(4):1485. doi: 10.3390/ijerph18041485 (PMC7915895; doi:10.3390/ijerph18041485)
Supplement: Supplementary file 1 [file ijerph-18-01485-s001.xlsx]

## Sheet: Table S1 - Student
Pattern Matrixa	Table S1
	Factor loadings of the Well-Lit 6 and other wellbeing measures in the student sample.
	Item	Factor 1	2	3	4	5	6	7	8	9	10	11	12	13	14	15	16	17	18	19	20	21	22	23
I am optimistic about my future.	PSY_Opt4	0.496
As I get older, I find myself more able to appreciate the people, events and situations that have been part of my history.	PSY_Gra1	0.449
If I had to list everything that I felt grateful for, it would be a very long list.	PSY_Gra3	0.441
I am optimistic about achieving my goals.	COG_Goa3	0.414
I believe that things will work out, no matter how difficult they seem.	PSY_Opt1	0.384
I am grateful to a wide variety of people.	PSY_Gra2	0.382
I think the things I have done in the past will help me in the future.	PSY_Hop2
In uncertain times, I expect the best.	PSY_Opt3
Even when others want to quit, I know that I can find ways to solve the problem.	PSY_Hop3
Even though I have many friends, I still feel lonely.	SOC_L1		0.528
I often feel misunderstood and alone.	SOC_L2		0.525
I don't fit in with my peers.	SOC_L3		0.447	0.351
I am often unhappy.	ES_Dep1		0.39
I often feel sad or hopeless.	ES_Dep2		0.334
I often feel like I'm losing control over my life.	ES_Stre2
I often get pushed around by other kids.	SOC_B3			0.8
I often receive nasty text messages.	SOC_CB1			0.767
Other kids often give me a hard time.	SOC_B2			0.761
Other people say mean things about me on social media.	SOC_CB2			0.719
I often get picked on by others.	SOC_B1			0.674																		0.352
My friends often pressure me into doing things I am not comfortable with.	SOC_NPP2			0.623
Other kids make fun of my culture.	SOC_B4			0.381
I often skip breakfast because there's not enough food at home.	ECO_BN4			0.351																	0.321	-0.316
My parent(s)/carer(s) consider my point of view whenever we talk about stuff.	SOC_Fam_A1				0.695
My parent(s)/carer(s) see the strengths that I have.	SOC_Fam_SK1				0.662
My parent(s)/carer(s) know my strengths well.	SOC_Fam_SK3				0.659
My parent(s)/carer(s) give me lots of opportunities to use my strengths.	SOC_Fam_SU3				0.643
I can talk to my parent(s)/carer(s) about my struggles and problems.	SOC_Fam_A2				0.638
My parent(s)/carer(s) encourage me to spend time doing the things I am good at.	SOC_Fam_SU1				0.628
I feel my parent(s)/carer(s) think I am good at things.	SOC_Fam_IN2				0.622
My parent(s)/carer(s) like me and care about me.	SOC_Fam_IN1				0.62
My parent(s)/carer(s) know the things I am good at.	SOC_Fam_SK2				0.597
My parent(s)/carer(s) encourage me to always play to my strengths.	SOC_Fam_SU2				0.591
My parent(s)/carer(s) trust me to make my own decisions.	SOC_Fam_A3				0.59
I feel free to express myself at home.	SOC_Fam_IN5				0.579
I like to spend time with my parent(s)/carer(s).	SOC_Fam_IN4				0.563
I feel that I am loved.	SOC_PSR2				0.324
I feel I do things well at home.	SOC_Fam_IN3				0.321
When I have a problem, I have someone who will be there for me.	SOC_PSR5				0.306
When something good happens to me, I have people in my life that I like to share the good news with.	SOC_PSR3				0.305
There are people in my life who really care about me.	SOC_PSR1
I have friends that I really care about.	SOC_PSR4					0.786
I like to spend time with my friends.	SOC_PC2					0.761
My friends like me and care about me.	SOC_PC1					0.702
I feel free to express myself with friends.	SOC_PC3					0.687
I feel my friends think I am good at things.	SOC_PC4					0.495
I usually share with others.	SOC_PA5					0.319
I try to be nice to other people.	SOC_PA4
My life is going well.	COG_LS2						0.552
I love life.	ES_Hap3						0.532
I have a good life.	COG_LS1						0.529
I feel happy.	ES_Hap4						0.508
My life is just right.	COG_LS3						0.501
I have a lot of fun.	ES_Hap1						0.466
I have so much in my life to be thankful for.	PSY_Gra4						0.378
I think that good things are going to happen to me.	PSY_Opt2						0.344
I take a positive attitude towards myself.	PSY_SEm1						0.327
I am a cheerful person.	ES_Hap2						0.323
I can be myself on most days.	PSY_Aut2
I know my strengths well.	ES_SK1							-0.661
I know the things I do best.	ES_SK2							-0.649
I know the things I am good at doing.	ES_SK4							-0.649
I find it easy to use my strengths in the things I do.	ES_SU3							-0.522
I know when I am at my best.	ES_SK3							-0.48
I use my strengths everyday.	ES_SU1							-0.452
I achieve what I want by using my strengths.	ES_SU2							-0.419
I have a clear idea of how I can achieve my goals.	COG_Goa2							-0.389
I have achieved the goals that I've set for myself in the past.	COG_Acc1
There are past accomplishments that I am proud of.	COG_Acc2
I feel safe in my neighbourhood.	SOC_C3
I try to help others in my community.	SOC_C4								-0.762
I actively contribute to my community.	SOC_C2								-0.753
I often volunteer to help others.	SOC_PA3								-0.719
I feel a great sense of belonging to my community.	SOC_C1								-0.4
I am helpful when someone is hurt, upset or feeling ill.	SOC_PA1								-0.352
I am satisfied with my overall fitness.	PHY_H2									0.892
I am satisfied with how I am physically.	PHY_SC3									0.871
My physical health is excellent.	PHY_H4									0.849
There are not many things I want to change about my physical appearance.	PHY_SC2									0.594
I am very satisfied with my health.	PHY_H3									0.565
I feel good about my looks.	PHY_SC1									0.536
On the whole, I am satisfied with myself.	PSY_SEm2									0.328
I am able to deal with unexpected events.	PSY_SEy3										0.53
I cope well with changes.	ES_Res1										0.432
I can think clearly when faced with stressful situations.	ES_Res5										0.383													-0.314
I can usually handle whatever comes my way.	PSY_SEy1										0.362
I quickly get over and recover from setbacks.	ES_Res4										0.357
I would do something that I know is wrong just to stay on my friend's good side.	SOC_NPP1										0.336							0.332
When I have a problem, I can come up with many ways to solve it.	PSY_Hop1
I am able to maintain my focus on things that I am doing in the present.	COG_Att1
I know a lot about wellbeing.	Wellbeing literacy_2											0.833
I have the skills to understand information about wellbeing.	Wellbeing literacy_4											0.706
I have many words I can think of to communicate about wellbeing.	Wellbeing literacy_1											0.59
I have the skills to express myself about wellbeing.	Wellbeing literacy_5											0.589
I know how to improve my wellbeing.	Wellbeing literacy_3											0.491
I can communicate about wellbeing in multiple ways (e.g., writing, listening, drawing) to suit the needs of my audience.	Wellbeing literacy_6											0.427
Generally, I feel free to express my ideas and opinions.	PSY_Aut1
I get so involved in activities that I forget about everything else.	PSY_Eng4												-0.823
When I do an activity, I enjoy it so much that I lose track of time.	PSY_Eng3												-0.748
I get completely absorbed in what I am doing.	PSY_Eng2												-0.634
When I am learning something new, I lose track of how much time has passed.	PSY_Eng1												-0.55
My teachers care about me.	SOC_PS2													0.826
When I have a problem, I can ask my teachers for help.	SOC_PS3													0.749
There are classes and activities that I enjoy in school.	SOC_PS1													0.357
I try to ignore thoughts and feelings that make me upset.	COG_Apt2														0.738
When I want to feel less negative emotion such as sadness, I change what I'm thinking about.	ES_ER_C2														0.674
When I want to feel more positive emotion such as joy, I change what I'm thinking about.	ES_ER_C1														0.535
I control my emotions by changing the way I think about the situation I'm in.	ES_ER_C3														0.464
When I'm faced with a stressful situation, I think of a way to help me stay calm.	ES_ER_C4														0.446
I can control my negative feelings (e.g. sadness, fear, anger).	ES_Res2														0.342
I am accepting of my thoughts and feelings.	COG_Apt1
I often lose my temper.	ES_Ang3															0.899
It is difficult for me to control my anger.	ES_Ang1															0.824
I am easily agitated.	ES_Ang2															0.739
I seldom fall sick.	PHY_H1																0.705
I keep at my schoolwork until I am done with it.	PSY_Per2																	-0.624
I am a hard worker.	PSY_Per4																	-0.512
I finish whatever I begin.	PSY_Per1																	-0.499
I feel capable of completing set tasks in school.	COG_Com1																	-0.46
I often go about my day without paying much attention to what I am doing.	COG_Att2																	0.421
Once I make a plan to get something done, I stick to it.	PSY_Per3																	-0.345
I am working towards achieving my goals.	COG_Goa1																	-0.325
I am satisfied with my ability to complete stuff I need to do at home (e.g. doing dishes, cleaning my room).	COG_Com2
I often feel sleepy and tired.	PHY_S1																		0.706
I am satisfied with my quality of sleep.	PHY_S4																		-0.628
I often feel energized when I wake up in the morning.	PHY_S3																		-0.591
I often have enough energy to get myself through the day.	PHY_S2																		-0.478
I often think about how I feel about a past experience.	ES_ER_R1																			-0.746
I often spend time re-living a past experience in my head.	ES_ER_R2																			-0.698
I find it hard to get over personal failures.	ES_Res3																			-0.463				0.307
I control my emotions by not showing them to others.	ES_ER_S2										0.331									-0.416
I often hide my feelings from others.	ES_ER_S1										0.301									-0.331
We experience financial problems at home.	ECO_BN1																				0.86
We have difficulties paying our bills at home.	ECO_BN2																				0.829
I often have to do paid work to support other family members.	ECO_BN6																				0.655
My parent(s)/carer(s) worry about losing a job or finding work.	ECO_BN5																				0.567	-0.327
I am often responsible for the cooking, cleaning, or childcare at home because my parent(s)/carer(s) are busy working.	ECO_BN8																				0.522
When I'm hungry, there's enough to eat.	ECO_BN3																				-0.315
We often have to stay in a homeless shelter or public place.	ECO_BN7			0.305																		-0.428
My family gets medical care when needed.	ECO_BN9																						-0.412
I am kind to younger children.	SOC_PA2																						-0.394
I can solve most problems if I make the necessary effort.	PSY_SEy2
I get stressed very easily.	ES_Stre1																							0.802
I worry a lot.	ES_Anx2																							0.762
I often feel nervous or anxious.	ES_Anx1																							0.581
Extraction Method: Principal Component Analysis.	Note. The principal component estimation and oblique rotation were used to examine factors. Factor loadings greater than .30 are shown as recommended by Costello and Osborne [1].
Rotation Method: Oblimin with Kaiser Normalization.a	1. Costello, A. B.; Osborne, J., Best practices in exploratory factor analysis: Four recommendations for getting the most from your analysis. Practical assessment, research, and evaluation 2005, 10 (1), 7.
a Rotation converged in 50 iterations.

## Sheet: Table S2 - Parent
Rotated Component Matrixa	Table S2
	Factor loadings of the Well-Lit 6 and other wellbeing measures in the parent sample.
	Item	Factor 1	2	3	4
interested in life	MHC2	0.729
that you had warm and trusting relationships with others	MHC11	0.723
that you liked most parts of your personality	MHC9	0.694
satisfied with life	MHC3	0.692	-0.421
that your life has a sense of direction or meaning to it	MHC14	0.687
happy	MHC1	0.665
confident to think or express your own ideas and opinions	MHC13	0.658
good at managing the responsibilities of your daily life	MHC10	0.618
that you had something important to contribute to society	MHC4	0.612
that you had experiences that challenged you to grow and become a better person	MHC12	0.573
I often feel nervous or anxious	NE3		0.814
I worry a lot	NE4		0.813
I get stressed very easily	NE5		0.773
I often feel sad or hopeless	NE2		0.749
I often feel like I'm losing control over my life	NE6		0.737
I am often unhappy	NE1		0.733
I often feel misunderstood and alone	NE7		0.699
Even though I have many friends, I still feel lonely	NE8		0.674
I have the skills to express myself about wellbeing	Wellbeing literacy_5			0.883
I know a lot about wellbeing	Wellbeing literacy_2			0.831
I have the skills to understand information about wellbeing	Wellbeing literacy_4			0.828
I can communicate about wellbeing in multiple ways (e.g., writing, listening, drawing) to suit the needs of my audience	Wellbeing literacy_6			0.8
I know how to improve my wellbeing	Wellbeing literacy_3			0.767
I have many words I can think of to communicate about wellbeing	Wellbeing literacy_1			0.751
that the way our society works makes sense to you	MHC8				0.797
that our society is a good place / is becoming a better place, for all people	MHC6				0.795
that people are basically good	MHC7				0.763
that you belonged to a community (like a social group, or your neighbourhood)	MHC5	0.473			0.496
Extraction Method: Principal Component Analysis.	Note. The principal component estimation and oblique rotation were used to examine factors. Factor loadings greater than .30 are shown.
Rotation Method: Varimax with Kaiser Normalization.a
a Rotation converged in 5 iterations.

## Sheet: Table S3 - School staff
Rotated Component Matrixa	Table S3
	Factor loadings of the Well-Lit 6 and other wellbeing measures in the school staff sample.
		Factor 1	2	3	4	5
interested in life	MHC2	0.801
that you had something important to contribute to society	MHC4	0.715
satisfied with life	MHC3	0.712		-0.444
that your life has a sense of direction or meaning to it	MHC14	0.711
happy	MHC1	0.677		-0.499
that you liked most parts of your personality	MHC9	0.664
that you had experiences that challenged you to grow and become a better person	MHC12	0.652
that you had warm and trusting relationships with others	MHC11	0.635
confident to think or express your own ideas and opinions	MHC13	0.612
that you belonged to a community (like a social group, or your neighbourhood)	MHC5	0.536
good at managing the responsibilities of your daily life	MHC10	0.485			-0.401
I have the skills to express myself about wellbeing	Wellbeing literacy_5		0.857
I have the skills to understand information about wellbeing	Wellbeing literacy_4		0.83
I know a lot about wellbeing	Wellbeing literacy_2		0.826
I have many words I can think of to communicate about wellbeing	Wellbeing literacy_1		0.81
I can communicate about wellbeing in multiple ways (e.g., writing, listening, drawing) to suit the needs of my audience	Wellbeing literacy_6		0.797
I know how to improve my wellbeing	Wellbeing literacy_3		0.742
Even though I have many friends, I still feel lonely	NE8			0.722
I often feel misunderstood and alone	NE7			0.697
I often feel sad or hopeless	NE2			0.651	0.401
I am often unhappy	NE1			0.625
I often feel like I'm losing control over my life	NE6			0.548	0.53
I get stressed very easily	NE5				0.863
I worry a lot	NE4				0.834
I often feel nervous or anxious	NE3				0.798
that the way our society works makes sense to you	MHC8					0.817
that our society is a good place / is becoming a better place, for all people	MHC6					0.783
that people are basically good	MHC7					0.753
Extraction Method: Principal Component Analysis.	Note. The principal component estimation and oblique rotation were used to examine factors. Factor loadings greater than .30 are shown.
Rotation Method: Varimax with Kaiser Normalization.a
a Rotation converged in 7 iterations.
